# Supplementary material for: High-Performance Wearable Bi2Te3-Based Thermoelectric Generator
Source: MDPI journal article supplement (doi:10.3390/app13105971), 2023-05-12
Supplement: s1 [file s1]

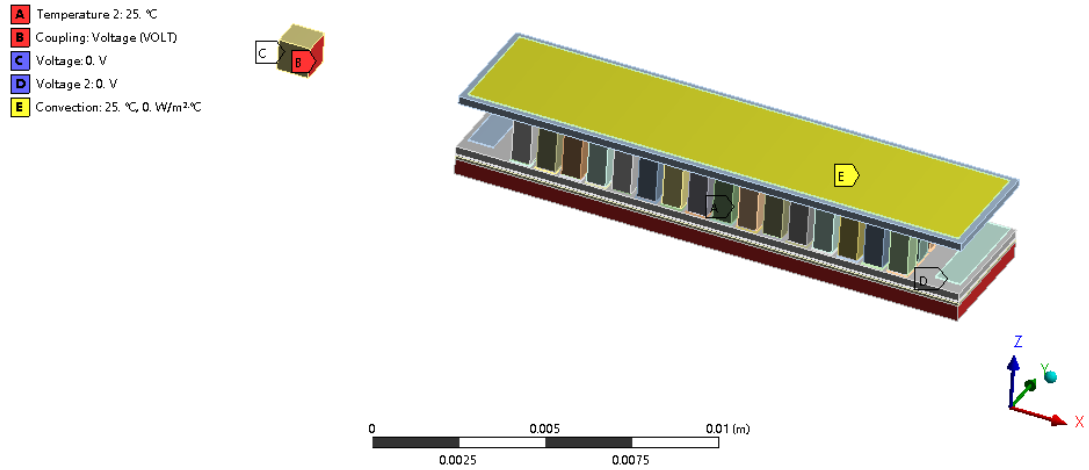

**Figure S1.** Finite element model of w-TEG.

**Table S1.** Thermoelectric material properties in the temperature range 303 to 333K.

| Materials                                          | Parameters                                                   | Value     |
|----------------------------------------------------|--------------------------------------------------------------|-----------|
| p-type $\text{Bi}_{0.5}\text{Sb}_{1.5}\text{Te}_3$ | Electrical conductivity<br>( $10^4 \text{ S m}^{-1}$ )       | 8.19~9.76 |
|                                                    | Thermal conductivity<br>( $\text{W m}^{-1} \text{ K}^{-1}$ ) | 1.53~1.58 |
|                                                    | Seebeck coefficient<br>( $\mu\text{V K}^{-1}$ )              | 223~231   |
| n-type $\text{Bi}_2\text{Te}_{2.7}\text{Se}_{0.3}$ | Electrical conductivity<br>( $10^4 \text{ S m}^{-1}$ )       | 9.91~11.1 |
|                                                    | Thermal conductivity<br>( $\text{W m}^{-1} \text{ K}^{-1}$ ) | 1.76~1.81 |
|                                                    | Seebeck coefficient<br>( $\mu\text{V K}^{-1}$ )              | -214~-212 |

**Table S2.** Material properties used in the simulation.

| Materials | Thermal conductivity<br>(W m <sup>-1</sup> K <sup>-1</sup> ) | Electrical resistivity<br>(ohm·m)              |
|-----------|--------------------------------------------------------------|------------------------------------------------|
| AlN       | 195~270                                                      | --                                             |
| Cu        | 401                                                          | $1.55 \times 10^{-8} \sim 2.78 \times 10^{-8}$ |
| Solder    | 55                                                           | $1.14 \times 10^{-7}$                          |
| Skin      | 11.8~14.2                                                    | --                                             |
| Ag        | 420                                                          | --                                             |

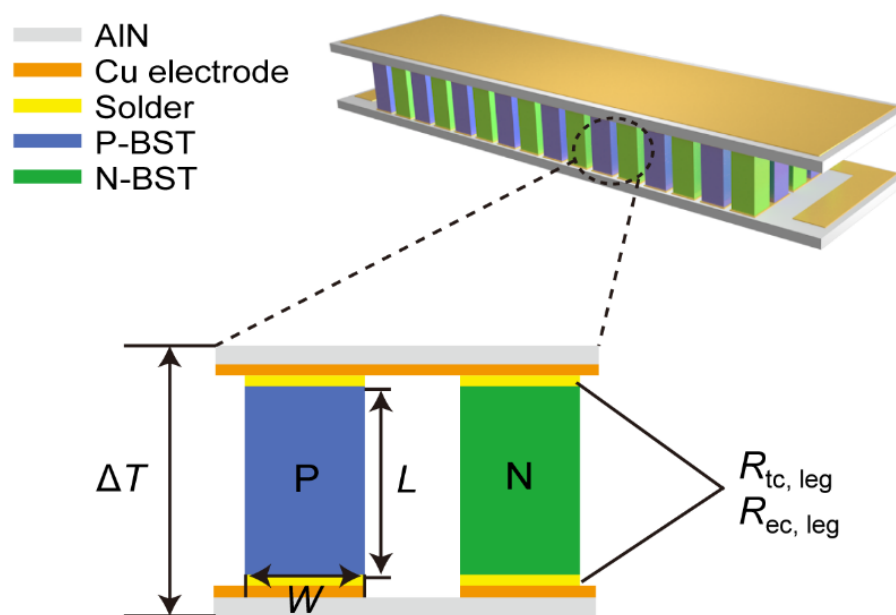

**Figure S2.** TEG unit and its internal structure.

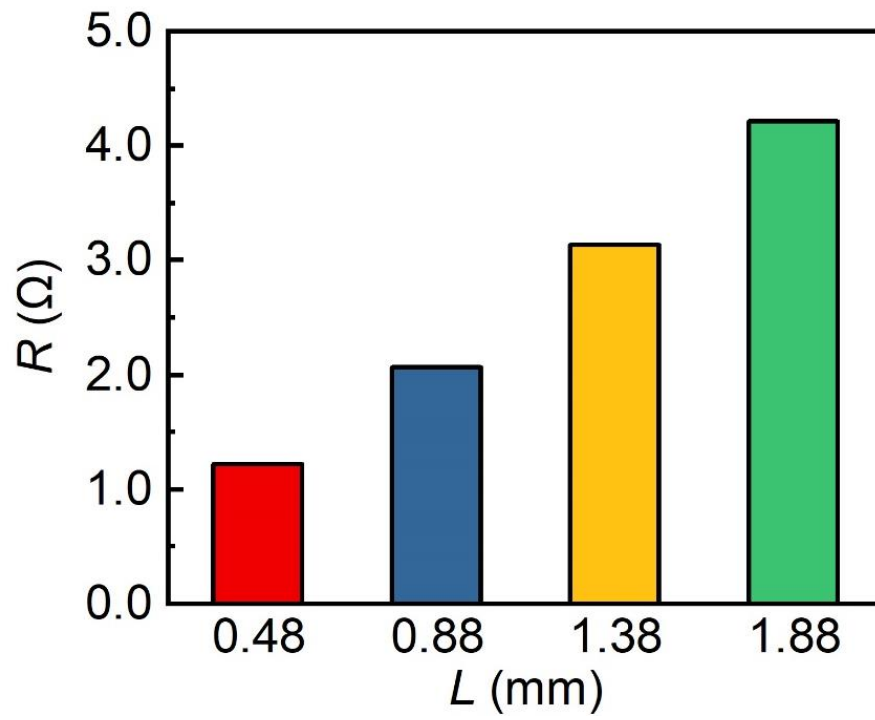

**Figure S3.** Resistance of TEG with different thermoelectric leg lengths.
